# Supplementary material
Source: publisher figshare collection journal article supplement (https://karger.figshare.com/ndownloader/files/28297575)
Supplement: Supplementary file 1 [file 28297575]

Table S1. Medications of interest

| **Medication classes** |  | **Generic names** |
| --- | --- | --- |
| Antihypertensive drugs | ACEI | perindopril, ramipril, enalapril, lisinopril, cilazapril, moexipril, imidapril, captopril |
|  | ARB | losartan, valsartan, fimasartan, olmesartan, irbesartan, candesartan, eprosartan, telmisartan |
|  | Diuretics | spironolactone, hydrochlorothiazide, furosemide, torasemide, indapamide, metolazone |
|  | Beta blocker | metoprolol, carvedilol, nebivolol, atenolol, propranolol |
|  | Direct renin inhibitor |  |
|  | Nitrate | isosorbide dinitrate, isosorbide mononitrate, nicorandil, nitroglycerin |
|  | NDP CCB | diltiazem, verapamil |
|  | DP CCB | amlodipine, barnidipine, benidipine, cilnidipine, efonidipine, felodipine, lacidipine, lercanidipine, manidipine, nicardipine, nifedipine, nimodipine, nisoldipine, |
|  | Alpha blocker | alfuzocin, doxazocin, tamsulosin, terazocin |
|  | Minoxidil |  |
|  | Other-antihypertensives |  |
| Anti-platelet drugs | Aspirin |  |
|  | Ticlopidine |  |
|  | Clopidogrel |  |
| Anti-coagulants | Warfarin |  |
|  | Other-anti-coagulants 1 |  |
|  | Other-anti-coagulants 2 |  |
| Lipid-lowering agents | Statin | Atorvastatin, fluvastatin, pitavastatin, pravastatin, rosuvastatin, simvastatin, |
|  | Ezetimibe |  |
|  | Fibrates | Bezafibrates, fenofibrate, gemfibrozil |
|  | Nicotinic acid |  |
|  | Other Lipid-lowering agents | omega-3 |
| CKD-MBD agents | Nutritional vitamin D | cholecalciferol, ergocalciferol |
|  | Active vitamin D | calcitriol, alfacalcidol, calcifediol |
|  | Vitamin D analogue |  |
|  | Calcium-based phosphate binder | Calcium acetate, calcium carbonate, |
|  | Calcimimetics |  |
|  | Aluminum-based phosphate binder |  |
|  | Non-calcium-based phosphate binder |  |
|  | Other CKD-MBD agents |  |
| Anemia medications | Oral iron |  |
|  | Intravenous iron |  |
|  | ESA |  |
| Anti-diabetic drugs | Insulins |  |
|  | Sulfonylureas |  |
|  | Alpha-glucosidase |  |
|  | Biguanides |  |
|  | Meglitinides |  |
|  | Thiazolidinedione |  |
|  | Incretin mimetics |  |
|  | DPP4 inhibitor |  |
|  | Other anti-diabetic drugs |  |
| Uric acid lowering agents | Allopurinol |  |
|  | Febuxostat |  |
|  | Benzbromarone |  |
|  | Other uric acid lowering agents |  |

ACEI, angiotensin-converting-enzyme inhibitor; ARB, angiotensin receptor blocker; NDP CCB, non-dihydropyridine calcium channel blocker; DP CCB, dihydropyridine calcium channel blocker; CKD-MBD, chronic kidney disease-mineral bone disorder; ESA, erythoropoiesis stimulating agents.
